# Supplementary material for: Risk of acute gastroenteritis associated with human bocavirus infection in children: A systematic review and meta-analysis
Source: PLoS One. 2017 Sep 14;12(9):e0184833. doi: 10.1371/journal.pone.0184833 (PMC5599015; doi:10.1371/journal.pone.0184833)
Supplement: S2 Text — (XLSX) [file pone.0184833.s003.xlsx]

## Sheet: Sheet1
	Definition adequate	Representativeness of the cases	Selection of Controls	Definition of Controls	Comparability	Ascertainment of exposure	Same method of ascertainment	Non-Response rate
Amit.Kapoor et al(2010) [15]	1	1	1	1	2	1	1	1
Thaweesak Chieochansin et al(2009)[22]	1	0	1	1	2	1	1	1
Jane L. et al(2009)[23]	0	0	0	1	2	1	1	1
L. Karalar et al(2010)[24]	1	1	0	1	1	1	1	1
Minna Risku et al(2012)[25]	1	1	1	1	1	1	1	1
Sameena Nawaz et al(2012)[26]	0	0	0	1	2	1	1	1
Thaweesak et al(2008)[27]	1	1	1	1	1	1	1	1
Wei-xia Cheng et al(2008)[11]	1	1	1	1	2	1	1	1
Yu Jin et al(2011)[13]	1	1	1	1	2	1	1	1
Zeng M et al(2008)[28]	0	1	1	1	2	1	1	1
